# Supplementary material for: Toward temperature-insensitive near-infrared optical gain using low-toxicity Ag2Se quantum dots
Source: Royal Society of Chemistry journal article supplement (doi:10.1039/d2nr01145j), 2022-01-01
Supplement: d2nr01145j1.pdf [file d2nr01145j1.pdf]

## Supplementary information

### Toward temperature-insensitive near-infrared optical gain using low-toxicity Ag<sub>2</sub>Se quantum dots

*Chen Liao,<sup>\*a</sup> Luping Tang,<sup>b,c</sup> Yan Li,<sup>a</sup> Shaoling Sun,<sup>d</sup> Liye Wang,<sup>a</sup> Jie Xu,<sup>a</sup> Yunzhe Jia<sup>a</sup> and  
Zixuan Gu<sup>a</sup>*

<sup>a</sup> College of Electronic and Optical Engineering & College of Microelectronics, Nanjing  
University of Posts and Telecommunications, Nanjing 210023, China

<sup>b</sup> College of Mechanical and Electronic Engineering, Nanjing Forestry University, Nanjing  
210037, China

<sup>c</sup> SEU-FEI Nano-Pico Center, Key Lab of MEMS of Ministry of Education, Southeast  
University, Nanjing 210096, China

<sup>d</sup> Joint International Research Laboratory of Information Display and Visualization, School of  
Electronic Science and Engineering, Southeast University, Nanjing 210096, China

#### Corresponding author

\*E-mail: chenliao@njupt.edu.cn.

#### This PDF file includes:

Fig. S1-S4  
Supplementary text  
References

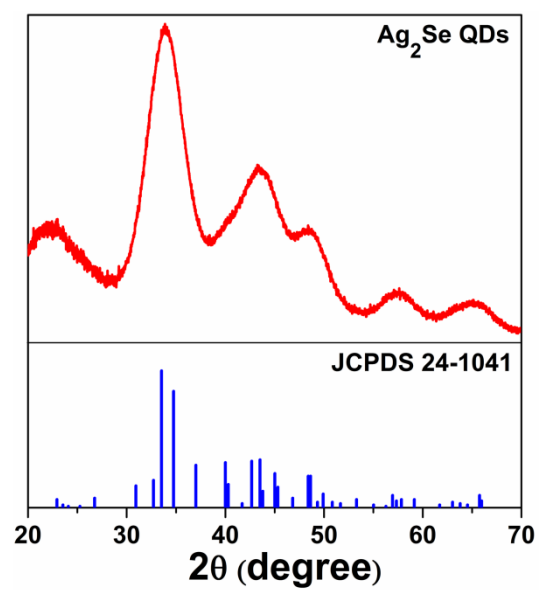

**Fig. S1** XRD spectrum (top) of Ag<sub>2</sub>Se QDs and XRD pattern (bottom) of the orthorhombic Ag<sub>2</sub>Se bulk (JCPDS 24-1041).

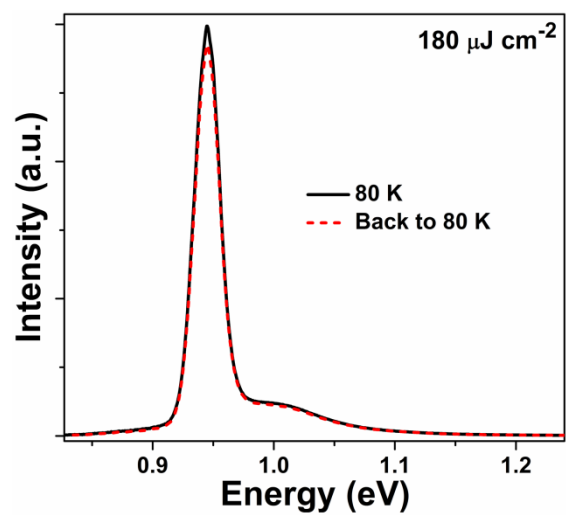

**Fig. S2** The initial emission spectrum of a Ag<sub>2</sub>Se QD film recorded at 80 K and the emission spectrum after heated to 340 K and then cooled back to 80 K.

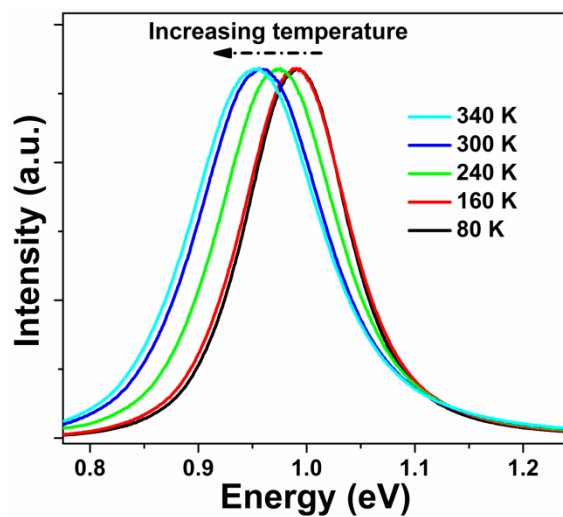

**Fig. S3** Spontaneous emission (SE) spectra of a Ag<sub>2</sub>Se QD film recorded at temperatures of 80-340 K.

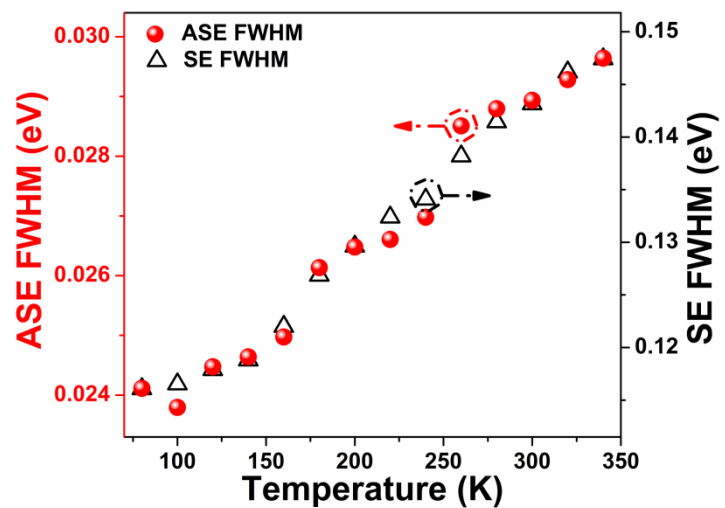

Fig. S4 ASE FWHM and SE FWHM versus temperature.

## Supplementary text

### S1. Bohr exciton diameter of orthorhombic Ag<sub>2</sub>Se

The Bohr exciton diameter ( $D_B$ ) of orthorhombic Ag<sub>2</sub>Se can be calculated according to Griffiths equation:<sup>1,2</sup>

$$D_B = \frac{8\pi\epsilon_0\epsilon\hbar^2}{e^2} \left( \frac{1}{m_e^*} + \frac{1}{m_h^*} \right)$$

where  $\epsilon_0$  is the vacuum dielectric constant,  $\epsilon$  is the dielectric constant of the material,  $\hbar$  is the reduced Planck constant,  $e$  is the charge on the electron, and  $m_e^*$  and  $m_h^*$  are the effective masses of the electron and hole, respectively. For the orthorhombic Ag<sub>2</sub>Se,  $\epsilon$  is 11,<sup>3</sup>  $m_e^*$  equals 0.17  $m_0$ , and  $m_h^*$  equals 0.75  $m_0$ , respectively,<sup>3-6</sup> where  $m_0$  is the free-electron mass. Therefore, the Bohr exciton diameter of orthorhombic Ag<sub>2</sub>Se is calculated to be 8.4 nm.

## References

1. D. J. Griffiths, *Introduction to quantum mechanics*, Prentice Hall, Upper Saddle River, NJ, USA, 1995.
2. V. I. Klimov, *Nanocrystal quantum dots*, CRC Press, Boca Raton, FL, USA, 2nd edn., 2010.
3. V. V. Gorbachev and I. M. Putilin, *Phys. Status Solidi B*, 1975, **69**, K153-K156.
4. V. Damodara Das and D. Karunakaran, *J. Appl. Phys.*, 1990, **67**, 878-883.
5. C. M. Fang, R. A. De Groot and G. A. Wiegers, *J. Phys. Chem. Solids*, 2002, **63**, 457-464.
6. S. Praharaj, S. Nath, S. Panigrahi, S. Basu, S. K. Ghosh, S. Pande, S. Jana and T. Pal, *Chem. Commun.*, 2006, 3836-3838.
